# Supplementary material
Source: PubMed Central journal article supplement (PMC3088609)
Supplement: 1018057108_pnas.1018057108_SI.pdf [file 1018057108_pnas.1018057108_SI.pdf]

# Supporting Information

Douezan et al. 10.1073/pnas.1018057108

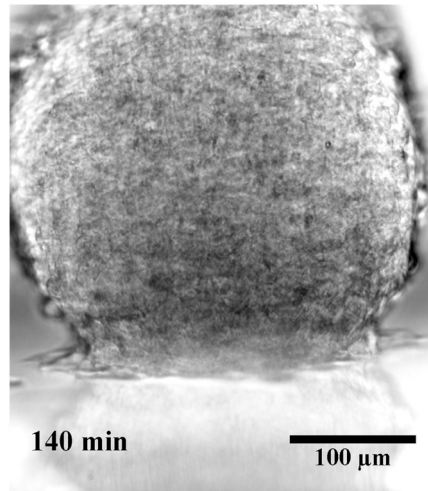

**Movie S1.** Side view of the spreading of a  $\phi = 100\%$  aggregate on a glass substrate coated with fibronectin ( $\chi = 100\%$ ). The dynamics of spreading exhibits two regimes. At short times, the aggregate deforms like a viscoelastic drop (from  $t = 0$  min to  $t = 90$  min). At long times ( $t > 90$  min), a precursor film of cells appears around the aggregate (complete wetting). This film consisting of a monolayer of cells grows and spreads around the aggregate.

[Movie S1 \(AVI\)](#)

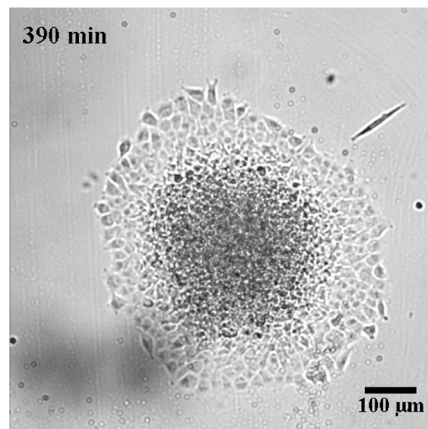

**Movie S2.** Top view of the growth of the precursor film for a cohesive aggregate ( $\phi = 100\%$ ) on a glass substrate coated with fibronectin ( $\chi = 100\%$ ). The film is strongly cohesive analogous to the liquid state.

[Movie S2 \(AVI\)](#)
